# Supplementary material
Source: PubMed Central journal article supplement (PMC1796801)

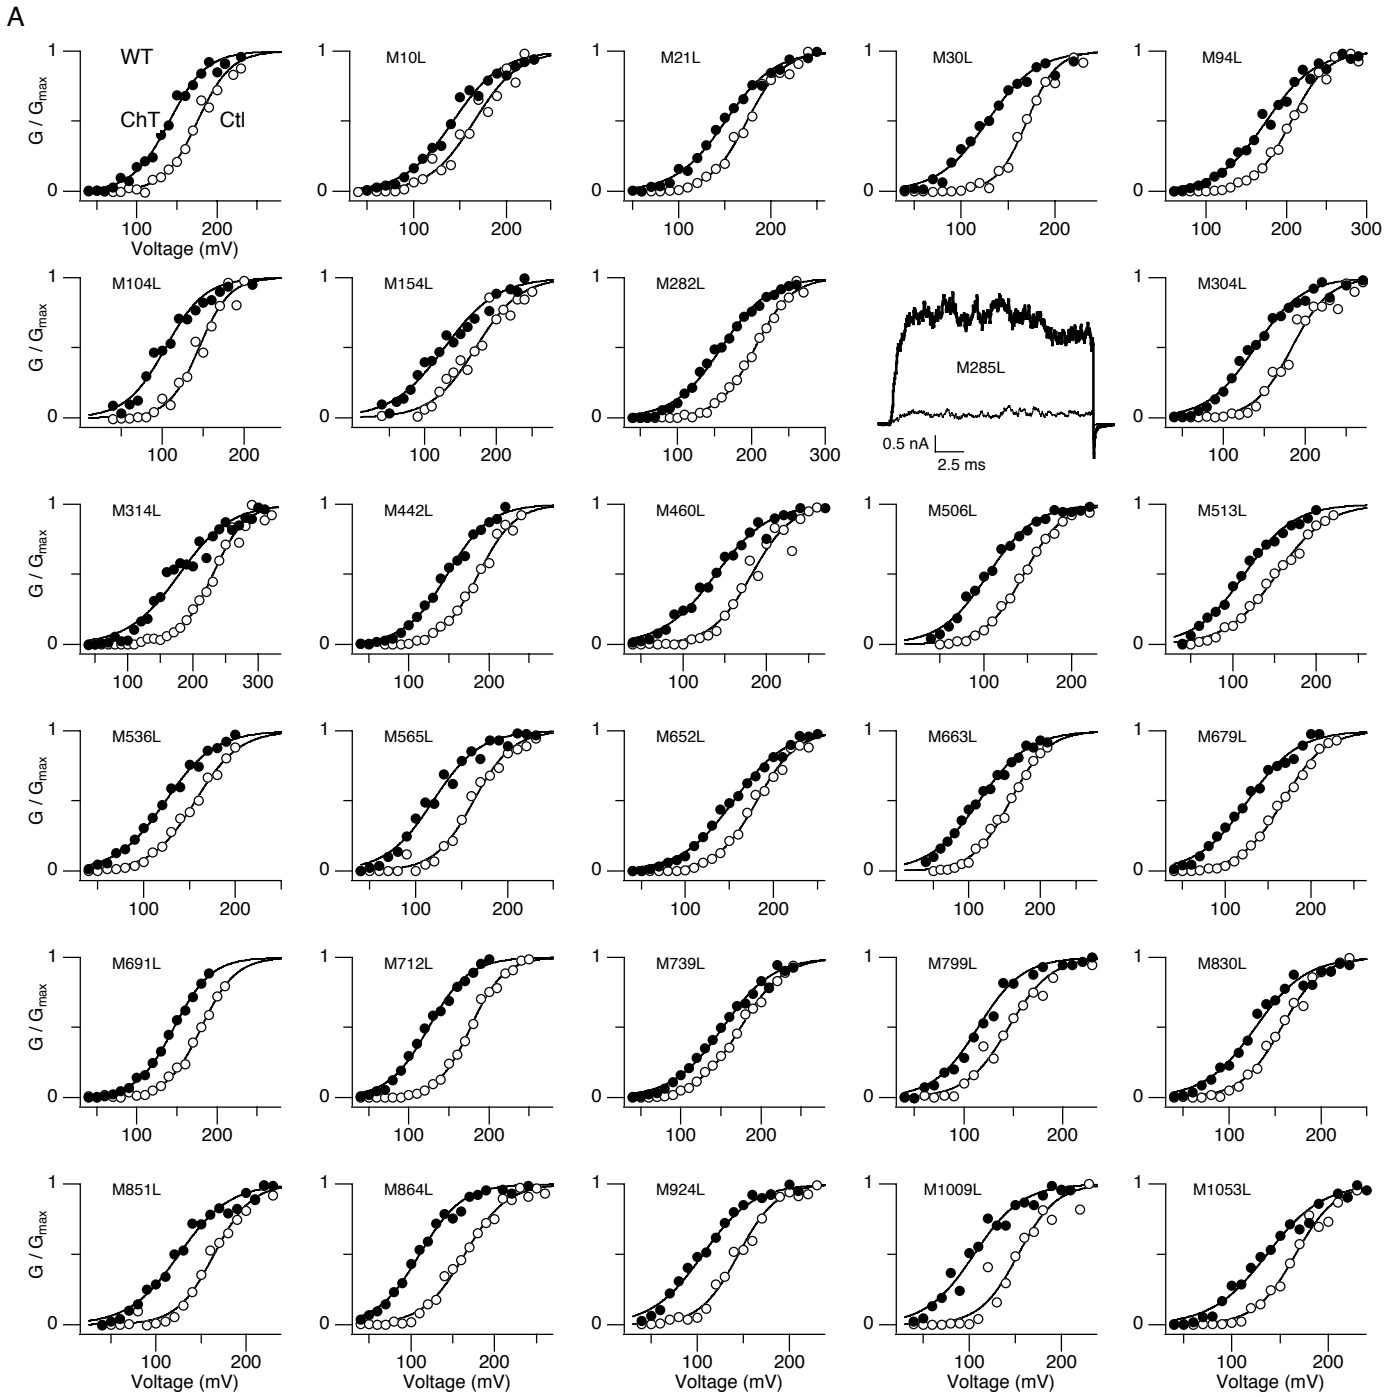

Supplement: tjp0571-0329-SuppFig1A.pdf [file tjp0571-0329-SuppFig1A.pdf]

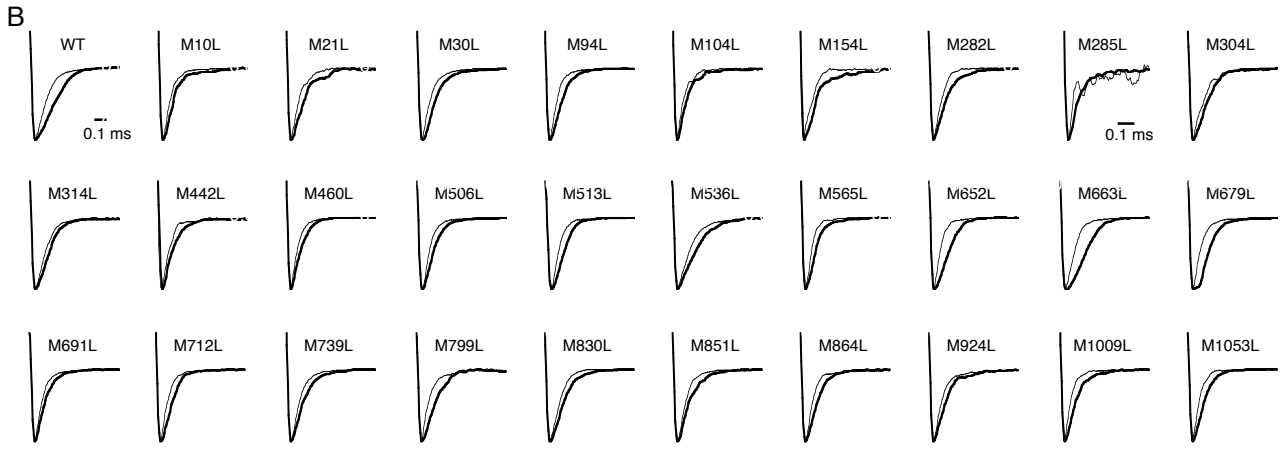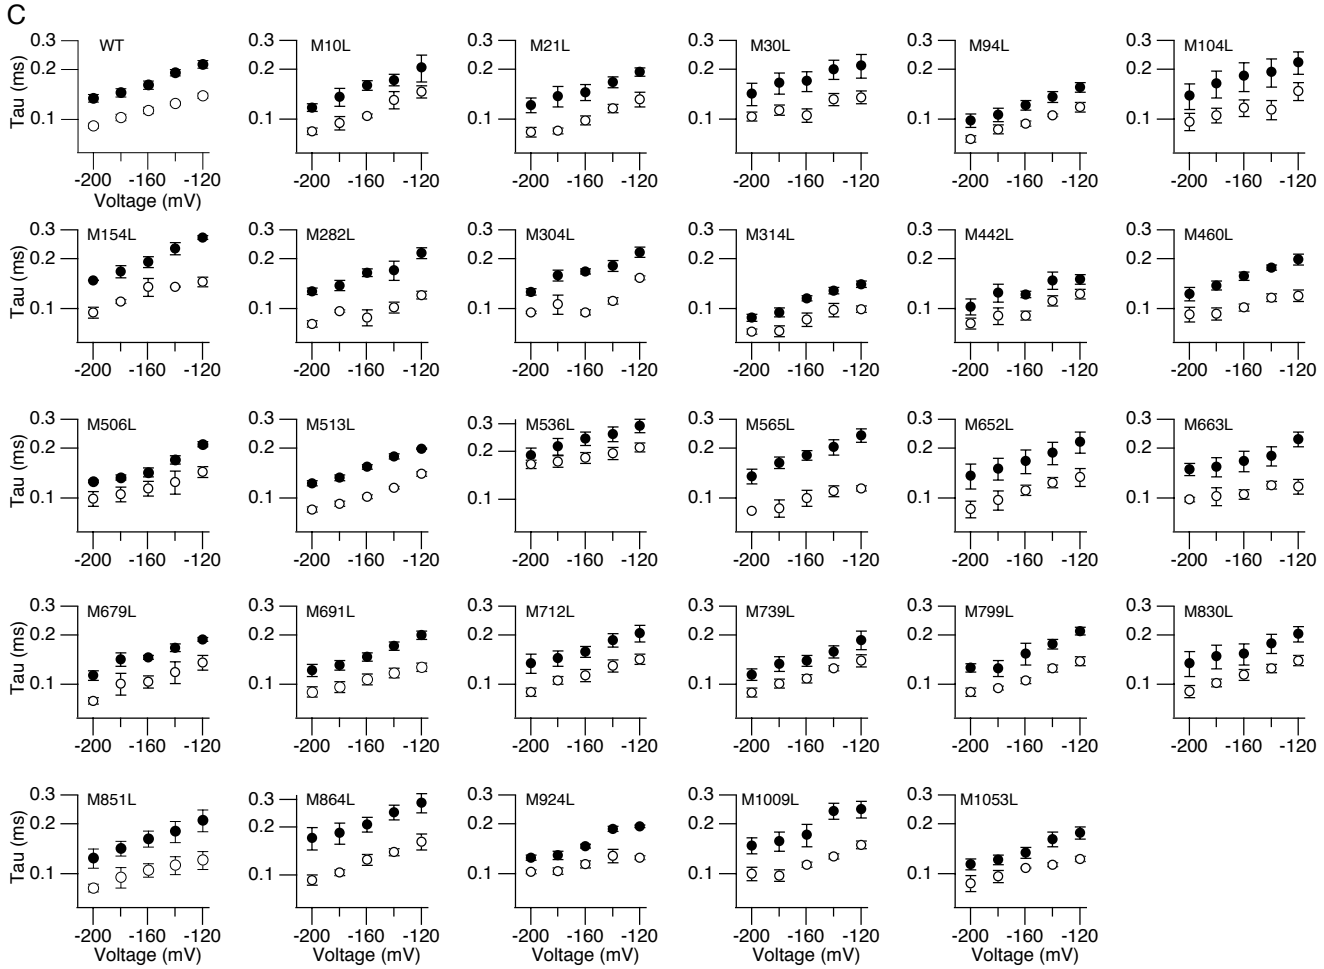

Supplement: tjp0571-0329-SuppFig1BC.pdf [file tjp0571-0329-SuppFig1BC.pdf]
